# Supplementary material
Source: PubMed Central journal article supplement (PMC4323934)
Supplement: NIHMS627093-supplement-Supp_Material.pdf [file NIHMS627093-supplement-Supp_Material.pdf]

**The relationship between blood IL-12p40 level and melanoma progression**

Shenyang Fang<sup>1</sup>, Yuling Wang<sup>1</sup>, Yun Shin Chun<sup>2</sup>, Huey Liu<sup>1</sup>, Merrick I. Ross<sup>1</sup>, Jeffrey E. Gershenwald<sup>1</sup>, Janice N. Cormier<sup>1</sup>, Richard E. Royal<sup>1</sup>, Anthony Lucci<sup>1</sup>, Christopher W. Schacherer<sup>1</sup>, John D. Reville<sup>3</sup>, Dawen Sui<sup>4</sup>, Roland L. Bassett Jr.<sup>4</sup>, Li-E Wang<sup>5</sup>, Qingyi Wei<sup>6</sup>, Christopher I. Amos<sup>7,8</sup>, Jeffrey E. Lee<sup>1,8</sup>

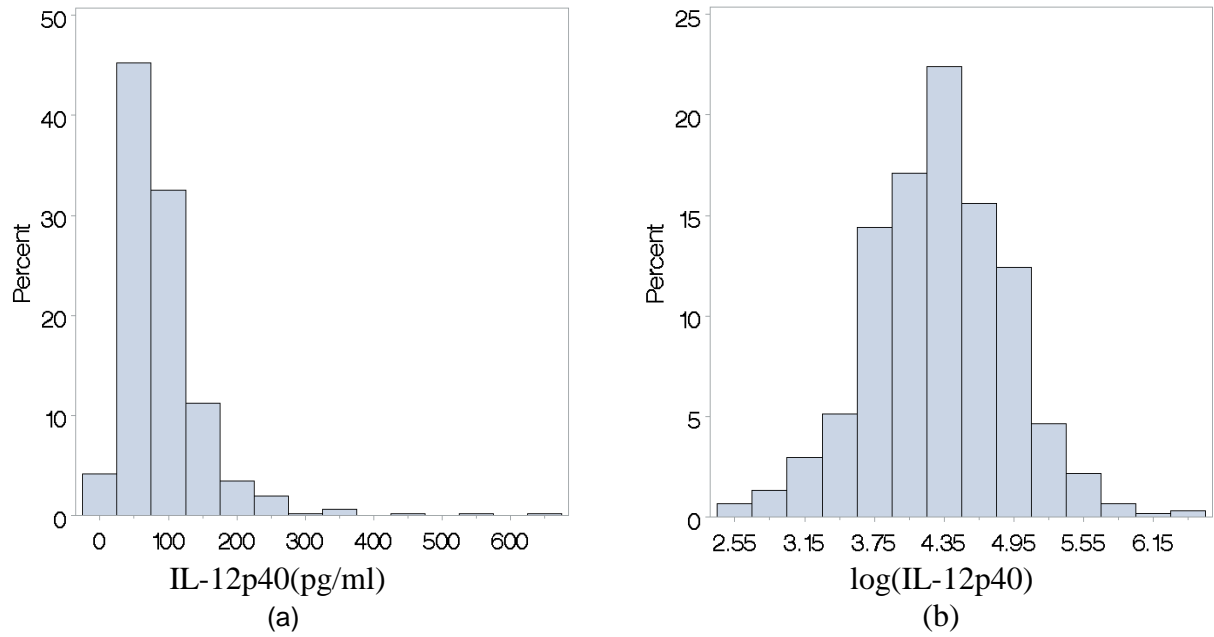

Supplementary Figure 1. Histogram for raw IL-12p40 data(a, Skewness=3.27, kurtosis=19.00) and log-transformed IL-12p40 values(b, Skewness=0.04, kurtosis=0.47) in 573 melanoma cases (discovery).

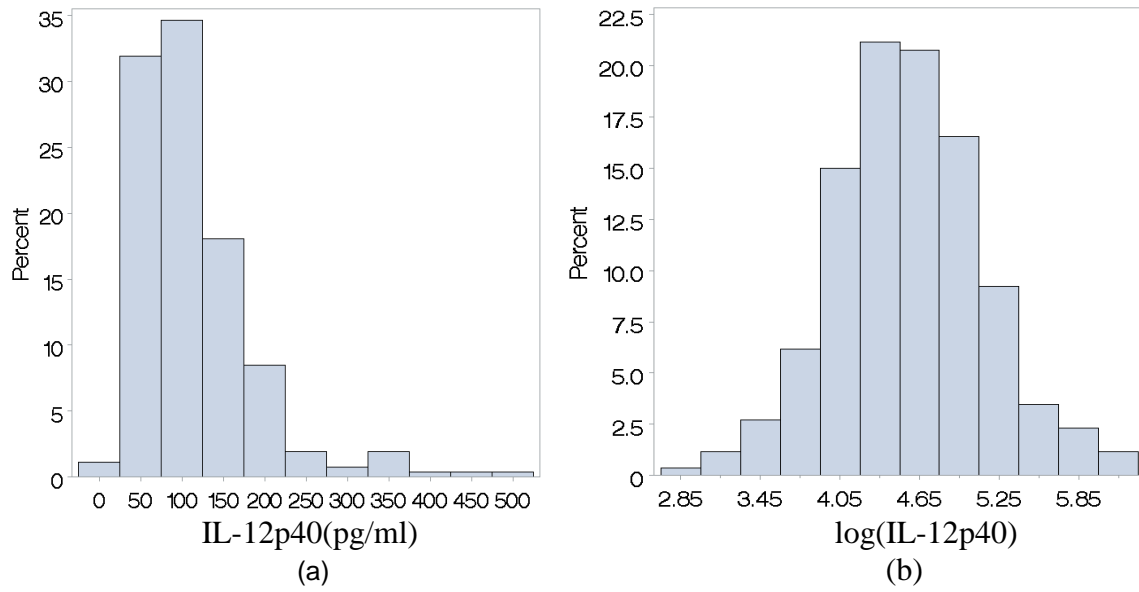

Supplementary Figure 2. Histogram for raw IL-12p40 data(a, Skewness=2.20, kurtosis=6.74) and log-transformed IL-12p40 values(b, Skewness=0.10, kurtosis=0.41) in 249 melanoma cases (Case validation set 1).

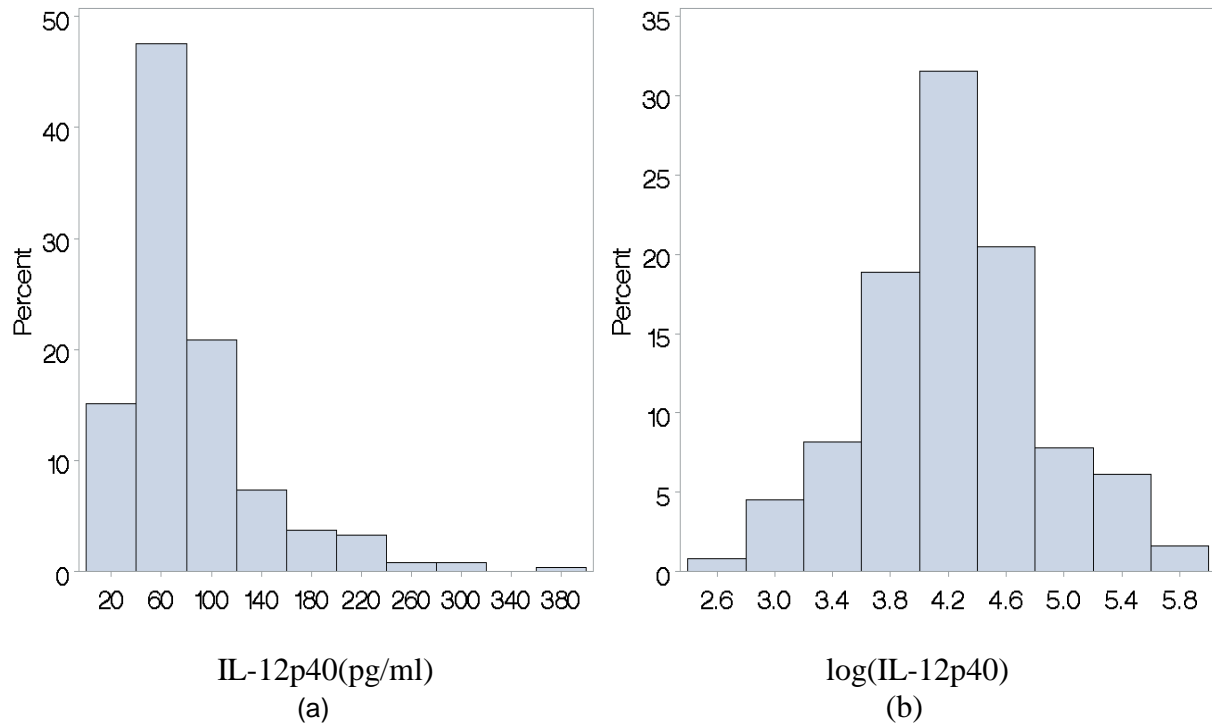

Supplementary Figure 3. Histogram for raw IL-12p40 data(a, Skewness=1.86, kurtosis=4.64) and log-transformed IL-12p40 values(b, Skewness=-0.06, kurtosis=0.15) in 244 melanoma cases (Case validation set 2).

Supplementary Table 1. Serial IL-12p40 plasma levels from 66 patients who underwent at least 2 blood draws (median time between blood draws 6.3 months)\*

|                | N  | Average days from 1st blood draw | IL-12p40(pg/ml) |                    |         | log transformed IL-12p40 <sup>#</sup> |                    |
|----------------|----|----------------------------------|-----------------|--------------------|---------|---------------------------------------|--------------------|
|                |    |                                  | Mean            | Standard Deviation | Median  | Mean                                  | Standard Deviation |
| Ist blood draw | 66 | 0                                | 121.020         | 78.778             | 97.964  | 4.616                                 | 0.606              |
| 2nd blood draw | 66 | 596.2                            | 136.650         | 107.644            | 108.392 | 4.682                                 | 0.684              |
| 3rd blood draw | 36 | 806.5                            | 161.458         | 140.311            | 121.026 | 4.777                                 | 0.810              |
| 4th blood draw | 21 | 1107.3                           | 96.830          | 54.895             | 83.457  | 4.404                                 | 0.627              |

\*Linear mixed model for the effect of time on log e of IL-12p40,  $P=0.1209$ .

# Correlation between duration and change of log transformed IL-12p40 Pearson  $r^2=0.14$ ,  $P=0.1097$ .

Supplementary Table 2. Comparison of log-transformed IL-12p40 levels between melanoma discovery and two validation sets, and between Control set and Validation set 1

| Status                | N   | Mean  | 95% CI |       | Univariate <i>P</i> -value* |
|-----------------------|-----|-------|--------|-------|-----------------------------|
| Case-discovery set    | 573 | 4.306 | 3.133  | 5.478 |                             |
| Case-validation set 1 | 249 | 4.569 | 3.453  | 5.684 | 0.438                       |
| Case-validation set 2 | 244 | 4.247 | 3.052  | 5.441 | 0.200                       |
| Control set**         | 299 | 4.569 | 3.623  | 5.516 | 0.958                       |

\* CI, confidence interval

\*\* Control set compared with Case-validation set 1 since IL-12p40 levels in those two sets were measured using the same assay kit in 2011; No difference in log-transformed IL-12p40 level between Control set and stage I/II Validation set 1 patients (N=106, mean=4.549, 95% CI= 4.440-4.658) (P=0.784)

Supplementary Table 3. Comparison of IL-12p40 plasma levels(pg/ml) from the same blood draw in 11 individuals tested by two scientists in 2007 and 2011 using different-generation assay kits\*.

|                             | IL-12p40<br>(pg/ml) | IL-12p40<br>(pg/ml) |
|-----------------------------|---------------------|---------------------|
| Lab ID                      | Scientist1_2007     | Scientist2_2011     |
| 1657                        | 21.818              | 21.856              |
| 1659                        | 114.668             | 97.408              |
| 1696                        | 69.645              | 81.681              |
| 1837                        | 40.780              | 68.395              |
| 1905                        | 144.769             | 171.354             |
| 2008                        | 86.700              | 72.948              |
| 2440                        | 125.080             | 182.826             |
| 2457                        | 47.120              | 66.705              |
| 2496                        | 174.010             | 189.058             |
| 2581                        | 102.840             | 197.811             |
| 2612                        | 147.414             | 179.625             |
| Log e Mean±Std <sup>#</sup> | 4.426±0.644         | 4.623±0.680         |

\*Pearson correlation  $r^2=0.87$ ,  $P=0.001$

# Log-transformed mean increase from 2007 to 2011, 4.5%

Supplementary Table 4. Comparison of IL-12p40 plasma levels(pg/ml) from the same blood draw in 11 individuals tested by the same scientist and same-generation assay kit in 2009 and 2011\*.

| Lab ID                      | 2009              | 2011              |
|-----------------------------|-------------------|-------------------|
| 1657                        | 25.812            | 21.856            |
| 1659                        | 123.256           | 97.408            |
| 1696                        | 71.668            | 81.681            |
| 1837                        | 55.414            | 68.395            |
| 1905                        | 165.227           | 171.354           |
| 2008                        | 74.089            | 72.948            |
| 2440                        | 171.187           | 182.826           |
| 2457                        | 67.085            | 66.705            |
| 2496                        | 179.572           | 189.058           |
| 2581                        | 101.324           | 197.811           |
| 2612                        | 164.227           | 179.625           |
| Log e                       |                   |                   |
| Mean $\pm$ Std <sup>#</sup> | 4.548 $\pm$ 0.607 | 4.623 $\pm$ 0.680 |

\*Wilcoxon matched-pairs signed-rank test  $P=0.1307$ .

\*Pearson correlation  $r^2=0.88$ ,  $P<0.001$

# Log-transformed mean increase from 2009 to 2011, 1.6%



Supplementary Table 5. Association of clinical factors with melanoma outcome in the univariate analysis\*

| Variable                              | DFS              |                 | MSS              |                 | OS              |                 |
|---------------------------------------|------------------|-----------------|------------------|-----------------|-----------------|-----------------|
|                                       | HR(95%CI)        | <i>P</i> -value | HR(95%CI)        | <i>P</i> -value | HR(95%CI)       | <i>P</i> -value |
| All(N=1066)                           |                  |                 |                  |                 |                 |                 |
| Stage#                                | -                | -               | 2.11(2.59-3.73)  | <0.0001         | 2.47(2.12-2.88) | <0.0001         |
| Stage I/II 1(N=751)                   |                  |                 |                  |                 |                 |                 |
| Tumor thickness                       | 1.11(1.08-1.14)  | <0.0001         | 1.11(1.07-1.16)  | <0.0001         | 1.10(1.06-1.14) | <0.0001         |
| Ulceration(Present VS not identified) | 4.67(3.02-7.21)  | <0.0001         | 5.90(3.28-10.60) | <0.0001         | 3.40(2.11-5.50) | <0.0001         |
| Mitosis(>=1 VS <1)                    | 9.56(4.16-22.00) | <0.0001         | 9.17(2.84-29.64) | 0.0002          | 4.09(2.09-7.98) | <0.0001         |
| Stage#                                | 4.88(3.33-7.14)  | <0.0001         | 6.23(3.56-10.90) | <0.0001         | 3.94(2.56-6.06) | <0.0001         |

\* CI, confidence interval

# Stage coded as a continuous variable(I=1, I/II=1.5, II=2, III=3, IV=4)

Supplementary Table 6. Meta-analysis of the relationship between per 10 unit change of IL12p40 and survival in the merged dataset

| Analysis                          | <i>P</i> -value <sup>a</sup> | <i>P</i> ( <i>R</i> )-value <sup>b</sup> | HR <sup>a</sup> | HR( <i>R</i> ) <sup>b</sup> | Q      | I     |
|-----------------------------------|------------------------------|------------------------------------------|-----------------|-----------------------------|--------|-------|
| <b>Overall survival</b>           |                              |                                          |                 |                             |        |       |
| Univariate-All                    | 6.44 × 10 <sup>-7</sup>      | 6.44 × 10 <sup>-7</sup>                  | 1.0354          | 1.0354                      | 0.7274 | 0     |
| Multivariate-all                  | 3.01 × 10 <sup>-5</sup>      | 2.62 × 10 <sup>-3</sup>                  | 1.0336          | 1.0347                      | 0.1892 | 39.95 |
| Univariate-stage I/II             | 8.02 × 10 <sup>-7</sup>      | 4.21 × 10 <sup>-5</sup>                  | 1.0466          | 1.0504                      | 0.2854 | 20.24 |
| Multivariate-stage I/II           | 8.78 × 10 <sup>-7</sup>      | 2.85 × 10 <sup>-3</sup>                  | 1.0533          | 1.072                       | 0.0732 | 61.75 |
| Univariate-stage III/IV           | 1.04 × 10 <sup>-1</sup>      | 1.04 × 10 <sup>-1</sup>                  | 1.0211          | 1.0211                      | 0.4037 | 0     |
| Multivariate-stage III/IV         | 2.00 × 10 <sup>-1</sup>      | 3.10 × 10 <sup>-1</sup>                  | 1.0167          | 1.0174                      | 0.2608 | 25.6  |
| <b>Melanoma specific survival</b> |                              |                                          |                 |                             |        |       |
| Univariate-All                    | 7.59 × 10 <sup>-5</sup>      | 7.59 × 10 <sup>-5</sup>                  | 1.0329          | 1.0329                      | 0.8529 | 0     |
| Multivariate-all                  | 3.97 × 10 <sup>-4</sup>      | 3.97 × 10 <sup>-4</sup>                  | 1.0336          | 1.0336                      | 0.4933 | 0     |
| Univariate-stage I/II             | 3.04 × 10 <sup>-4</sup>      | 3.04 × 10 <sup>-4</sup>                  | 1.0454          | 1.0454                      | 0.4052 | 0     |
| Multivariate-stage I/II           | 3.35 × 10 <sup>-5</sup>      | 5.27 × 10 <sup>-3</sup>                  | 1.0593          | 1.0757                      | 0.1143 | 53.9  |
| Univariate-stage III/IV           | 6.69 × 10 <sup>-2</sup>      | 6.69 × 10 <sup>-2</sup>                  | 1.0239          | 1.0239                      | 0.6842 | 0     |
| Multivariate-stage III/IV         | 1.25 × 10 <sup>-1</sup>      | 1.25 × 10 <sup>-1</sup>                  | 1.0203          | 1.0203                      | 0.4837 | 0     |
| <b>Disease-free survival</b>      |                              |                                          |                 |                             |        |       |
| Univariate                        | 4.21 × 10 <sup>-4</sup>      | 4.21 × 10 <sup>-4</sup>                  | 1.0342          | 1.0342                      | 0.963  | 0     |
| Multivariate                      | 8.48 × 10 <sup>-5</sup>      | 8.48 × 10 <sup>-5</sup>                  | 1.0413          | 1.0413                      | 0.9252 | 0     |

a. *P*-value and hazard ratio[HR] for the effect of IL-12p40 on outcome in the combined data set using fixed effect model ;

b. *P*-value and hazard ratio(*R*)[HR(*R*)] for the effect of IL-12p40 on outcome in the combined data set using random effect model;
